# Supplementary material for: Middle molecule clearance with high cut-off dialyzer versus high-flux dialyzer using continuous veno-venous hemodialysis with regional citrate anticoagulation: A prospective randomized controlled trial
Source: PLoS One. 2019 Apr 26;14(4):e0215823. doi: 10.1371/journal.pone.0215823 (PMC6485708; doi:10.1371/journal.pone.0215823)
Supplement: S1 Supporting Information — (DOCX) [file pone.0215823.s009.docx]

**Abbreviations**

RRT: renal replacement therapy; CRRT: continuous renal replacement therapy; IHD: intermittent hemodialysis; CVVHD: continuous veno-venous hemodialysis; CVVH: continuous veno-venous hemofiltration; HCO: high cut-off; ICU: intensive care unit; KDIGO: Kidney Disease: Improving Global Outcomes; QB: blood flow in extracorporeal circuit; h: hour; Da: Dalton; kDa: kilo-Dalton; Qp: plasma flow in extracorporeal circuit; Hct: hematocrit; Clp: plasma clearance; ml/min: milliliters per minute; ml/h: milliliters per hour; Cpost-dialyzer: concentration post-dialyzer; Cpost-dialyzer, corr.: corrected concentration post-dialyzer; Cpre-dialyzer: concentration pre-dialyzer; Cltotal: total plasma clearance; Cl1h: plasma clearance after 1 hour; Cl6h: plasma clearance after 6 hours; Cl12h: plasma clearance after 12 hours; Cl24h: plasma clearance after 24 hours; Cl48h: plasma clearance after 48 hours; Clmean: mean plasma clearance; UFRmean: mean ultrafiltration rate; UFR1h: ultrafiltration rate after 1 hour; UFR6h: ultrafiltration rate after 6 hours; UFR12h: ultrafiltration rate after 12 hours; UFR24h: ultrafiltration rate after 24 hours; UFR48h: ultrafiltration rate after 48 hours; CI: confidence interval; APACHE II: Acute Physiology And Chronic Health Evaluation II ; SAPS II: Simplified Acute Physiology Score II; SOFA score: Sequential organ failure assessment score; RNA: ribonucleic acid; SLEDD: sustained low-efficiency daily dialysis; CVVHDF: continuous veno-venous hemodiafiltration
